# Supplementary material
Source: publisher figshare collection journal article supplement (https://sage.figshare.com/ndownloader/files/22046715)
Supplement: Supplementary file 1 [file 22046715]

**Appendix 2:** Multiple regression analyses results for each examination type separately; history, clinical, and MRI.

Table 1: Multiple regression models for patient history only. (n=50, n=42, n=60, respectively).

| Clinically pain free     |                      |                         | Completed sports training                |                      |                         | Return to full team training             |                      |                         |
|--------------------------|----------------------|-------------------------|------------------------------------------|----------------------|-------------------------|------------------------------------------|----------------------|-------------------------|
| Variable                 | Predictor importance | Adjusted r <sup>2</sup> | Variable                                 | Predictor importance | Adjusted r <sup>2</sup> | Variable                                 | Predictor importance | Adjusted r <sup>2</sup> |
| Coughing pain (y/n)      | 0.31                 | 0.519                   | Coughing pain (y/n)                      | 0.41                 | 0.614                   | HAGOS – Symptoms (0-100)                 | 0.59                 | 0.445                   |
| HAGOS - Symptoms (0-100) | 0.22                 |                         | Compliance (%)                           | 0.23                 |                         | Walking pain (0-10)                      | 0.15                 |                         |
| Compliance (%)           | 0.17                 |                         | HAGOS – QOL (0-100)                      | 0.09                 |                         | Discontinuation of sport within 5m (y/n) | 0.10                 |                         |
| Age (y)                  | 0.16                 |                         | Discontinuation of sport within 5m (y/n) | 0.08                 |                         | HAGOS – Pain (0-100)                     | 0.10                 |                         |
| Walking pain (0-10)      | 0.08                 |                         | HAGOS – ADL (0-100)                      | 0.07                 |                         | Coughing pain (y/n)                      | 0.05                 |                         |
| HAGOS – QOL (0-100)      | 0.06                 |                         | HAGOS – Pain (0-100)                     | 0.05                 |                         |                                          |                      |                         |
|                          |                      |                         | Max pain at injury time (0-10)           | 0.04                 |                         |                                          |                      |                         |
|                          |                      |                         | HAGOS - Sport (0-100)                    | 0.03                 |                         |                                          |                      |                         |

Table 2: Multiple regression models for clinical examination tests only. (n=55, n=45, n=68, respectively).

| Clinically pain free                                      |                      |                         | Completed sports training                                 |                      |                         | Return to full team training                              |                      |                         |
|-----------------------------------------------------------|----------------------|-------------------------|-----------------------------------------------------------|----------------------|-------------------------|-----------------------------------------------------------|----------------------|-------------------------|
| Variable                                                  | Predictor importance | Adjusted r <sup>2</sup> | Variable                                                  | Predictor importance | Adjusted r <sup>2</sup> | Variable                                                  | Predictor importance | Adjusted r <sup>2</sup> |
| Palpation pain AL insertion (y/n)                         | 0.28                 | 0.596                   | Palpable defect (y/n)                                     | 0.34                 | 0.668                   | Palpable defect (y/n)                                     | 0.57                 | 0.653                   |
| Outer-range resisted adduction pain (y/n)                 | 0.25                 |                         | Outer-range resisted adduction pain (y/n)                 | 0.18                 |                         | Palpation pain AL insertion (y/n)                         | 0.14                 |                         |
| Palpable defect (y/n)                                     | 0.17                 |                         | Palpation pain AL insertion (y/n)                         | 0.14                 |                         | Ability to perform eccentric adductor strength test (y/n) | 0.14                 |                         |
| Ability to perform eccentric adductor strength test (y/n) | 0.15                 |                         | Resistance/stretch pain of hip flexors (y/n)              | 0.09                 |                         | Squeeze 0° pain (y/n)                                     | 0.06                 |                         |
| Resistance/stretch pain of hip flexors (y/n)              | 0.07                 |                         | Palpation pain abdominal muscles (y/n)                    | 0.07                 |                         | Hip abduction ROM symmetry (%)                            | 0.06                 |                         |
| Palpation pain abdominal muscles (y/n)                    | 0.07                 |                         | Ability to perform eccentric adductor strength test (y/n) | 0.07                 |                         | Resistance/stretch pain of hip flexors (y/n)              | 0.03                 |                         |
|                                                           |                      |                         | Resistance/stretch pain of abdominal muscles (y/n)        | 0.06                 |                         |                                                           |                      |                         |
|                                                           |                      |                         | Bent knee fall out symmetry (%)                           | 0.05                 |                         |                                                           |                      |                         |

Table 3: Multiple regression models for MRI results only. (n=59, n=49, n=73, respectively).

| Clinically pain free |                      |                         | Completed sports training |                      |                         | Return to full team training |                      |                         |
|----------------------|----------------------|-------------------------|---------------------------|----------------------|-------------------------|------------------------------|----------------------|-------------------------|
| Variable             | Predictor importance | Adjusted r <sup>2</sup> | Variable                  | Predictor importance | Adjusted r <sup>2</sup> | Variable                     | Predictor importance | Adjusted r <sup>2</sup> |
| MRI BTJ/MTJ          | 0.90                 | 0.607                   | MRI BTJ/MTJ               | 0.85                 | 0.688                   | MRI BTJ/MTJ                  | 0.85                 | 0.659                   |
| MRI grading (0-3)    | 0.10                 |                         | MRI grading               | 0.15                 |                         | MRI grading                  | 0.15                 |                         |
