# Supplementary material
Source: publisher figshare collection journal article supplement (https://sage.figshare.com/ndownloader/files/22046715)
Supplement: Supplementary file 2 [file 22046715]

Appendix 3: Post hoc univariate analyses results for all examination types; patient history, clinical, MRI.

| Patient history                                     |                      |                        |                        |                          |         |                           |                             |                        |                          |         |                              |                        |                         |                          |         |
|-----------------------------------------------------|----------------------|------------------------|------------------------|--------------------------|---------|---------------------------|-----------------------------|------------------------|--------------------------|---------|------------------------------|------------------------|-------------------------|--------------------------|---------|
| Variable                                            | Clinically pain free |                        |                        |                          |         | Completed sports training |                             |                        |                          |         | Return to full team training |                        |                         |                          |         |
|                                                     | n                    | Variable distribution  | CPF days               | Standardized effect size | p-value | n                         | Variable distribution       | SST days               | Standardized effect size | p-value | n                            | Variable distribution  | RTT days                | Standardized effect size | p-value |
| Age (y)                                             | 42                   | 26.4 (4.3), 20-37      | 13 [11-19], 6-33       | 0.287                    | 0.065   | 33                        | 26.6 (4.5), 20-37           | 17 [15-27], 9-37       | -0.019                   | 0.917   | 50                           | 26.2 (4.3), 18-37      | 19.1 (8.2), 5-41        | 0.019                    | 0.898   |
| Height (cm)                                         | 42                   | 181 [175-186], 168-210 | 13 [11-19], 6-33       | -0.261                   | 0.095   | 33                        | 182 [175-186], 168-203      | 17 [15-27], 9-37       | -0.339                   | 0.054   | 50                           | 178 [174-186], 166-210 | 19.1 (8.2), 5-41        | -0.149                   | 0.302   |
| Weight (kg)                                         | 42                   | 80.1 (12.9), 55-109    | 13 [11-19], 6-33       | -0.147                   | 0.353   | 33                        | 80.7 (12.8), 55-108         | 17 [15-27], 9-37       | -0.349                   | 0.046   | 50                           | 75 [70-88], 55-109     | 19.1 (8.2), 5-41        | -0.069                   | 0.634   |
| BMI (kg/m²)                                         | 42                   | 24.1 (2.2), 19.5-30.9  | 13 [11-19], 6-33       | 0.002                    | 0.992   | 33                        | 24.5 [23.6-25.7], 19.5-30.9 | 17 [15-27], 9-37       | -0.291                   | 0.100   | 50                           | 23.9 (2.3), 19.5-30.9  | 19.1 (8.2), 5-41        | 0.070                    | 0.629   |
| Type of sport                                       | 42                   |                        |                        | -                        | 0.454   | 33                        |                             |                        | -                        | 0.619   | 50                           |                        |                         | -                        | 0.966   |
| - football                                          |                      | 23 (55%)               | 12 [11-16.5], 7-24     |                          |         |                           | 17 (52%)                    | 17 [16-24], 10-30      |                          |         |                              | 26 (52%)               | 17.5 [13-22], 7-33      |                          |         |
| - futsal                                            |                      | 9 (21%)                | 16 [14-23], 6-26       |                          |         |                           | 9 (27%)                     | 24 [16-27], 10-30      |                          |         |                              | 13 (26%)               | 24 [11-27], 5-30        |                          |         |
| - other                                             |                      | 10 (24%)               | 12.5 [7-25], 7-33      |                          |         |                           | 7 (21%)                     | 16 [11.5-23.5], 9-37   |                          |         |                              | 11 (22%)               | 16 [13.5-24], 10-41     |                          |         |
| Injury mechanism                                    | 42                   |                        |                        | -                        | 0.621   | 33                        |                             |                        | -                        | 0.446   | 50                           |                        |                         | -                        | 0.804   |
| - kicking                                           |                      | 8 (19%)                | 12 [11.5-13.5], 8-18   |                          |         |                           | 7 (21%)                     | 16 [15.5-17.5], 10-28  |                          |         |                              | 10 (20%)               | 16.6 (7), 7-31          |                          |         |
| - change of direction                               |                      | 12 (29%)               | 13.5 [9.5-23.5], 6-28  |                          |         |                           | 11 (33%)                    | 16 [12-27], 9-30       |                          |         |                              | 14 (28%)               | 21.1 (10.1), 7-41       |                          |         |
| - reaching                                          |                      | 7 (17%)                | 17 [11.5-23.5], 8-33   |                          |         |                           | 5 (15%)                     | 24 [20-30], 13-37      |                          |         |                              | 9 (18%)                | 18.3 (5.6), 12-27       |                          |         |
| - other                                             |                      | 15 (36%)               | 13 [11-17.5], 7-29     |                          |         |                           | 10 (30%)                    | 19 [16-26], 10-30      |                          |         |                              | 17 (34%)               | 18.4 (8.7), 5-33        |                          |         |
| Maximum pain at injury onset (0-10)                 | 42                   | 7 (1.8), 3-10          | 13 [11-19], 6-33       | 0.305                    | 0.050   | 33                        | 7 [5-8], 4-10               | 17 [15-27], 9-37       | 0.316                    | 0.074   | 50                           | 7 [5-8], 3-10          | 19.1 (8.2), 5-41        | 0.165                    | 0.253   |
| Discontinuation of sport within 5 min               | 42                   |                        |                        | 0.097                    | 0.536   | 33                        |                             |                        | 0.083                    | 0.638   | 50                           |                        |                         | -0.780                   | 0.012   |
| - no                                                |                      | 13 (31%)               | 12 [10-17], 7-33       |                          |         |                           | 11 (33%)                    | 16 [14.5-23.5], 10-37  |                          |         |                              | 17 (34%)               | 15.1 (7), 5-32          |                          |         |
| - yes                                               |                      | 29 (69%)               | 13 [12-19], 6-29       |                          |         |                           | 22 (67%)                    | 20.5 [15-27], 9-30     |                          |         |                              | 33 (66%)               | 21.2 (8.2), 7-41        |                          |         |
| "Popping" sound at injury time                      | 38                   |                        |                        | 0.028                    | 0.883   | 30                        |                             |                        | -0.051                   | 0.787   | 46                           |                        |                         | -0.208                   | 0.604   |
| - no                                                |                      | 31 (82%)               | 13 [11-21], 7-29       |                          |         |                           | 25 (83%)                    | 17 [15-27], 9-30       |                          |         |                              | 38 (83%)               | 19.1 (7.4), 5-32        |                          |         |
| - yes                                               |                      | 7 (18%)                | 13 [12.5-15.5], 6-28   |                          |         |                           | 5 (17%)                     | 18 [16-21], 10-24      |                          |         |                              | 8 (17%)                | 20.8 (11.5), 9-41       |                          |         |
| Walking pain (0-10)                                 | 42                   | 0 [0-2], 0-7           | 13 [11-19], 6-33       | 0.234                    | 0.136   | 33                        | 0 [0-2], 0-7                | 17 [15-27], 9-37       | 0.351                    | 0.045   | 50                           | 0 [0-3], 0-7           | 19.1 (8.2), 5-41        | 0.209                    | 0.146   |
| Dominant leg injured                                | 41                   |                        |                        | 0.012                    | 0.937   | 32                        |                             |                        | -0.118                   | 0.512   | 49                           |                        |                         | -0.012                   | 0.963   |
| - no                                                |                      | 20 (49%)               | 13.5 [10.5-20.5], 6-29 |                          |         |                           | 14 (44%)                    | 21 [14-27], 10-30      |                          |         |                              | 24 (49%)               | 19.2 (7.6), 7-33        |                          |         |
| - yes                                               |                      | 21 (51%)               | 13 [11-19], 7-33       |                          |         |                           | 18 (56%)                    | 16.5 [15-27], 9-37     |                          |         |                              | 25 (51%)               | 19.3 (9.1), 5-41        |                          |         |
| Coughing pain                                       | 42                   |                        |                        | 0.204                    | 0.198   | 33                        |                             |                        | 0.248                    | 0.182   | 50                           |                        |                         | 0.087                    | 0.560   |
| - no                                                |                      | 39 (93%)               | 13 [11-18], 6-33       |                          |         |                           | 32 (97%)                    | 17 [14.5-26.5], 9-37   |                          |         |                              | 47 (94%)               | 18 [13-26.5], 5-41      |                          |         |
| - yes                                               |                      | 3 (7%)                 | 19 [16-22], 13-25      |                          |         |                           | 1 (3%)                      | 30                     |                          |         |                              | 3 (6%)                 | 22, 12-31               |                          |         |
| HAGOS Symptoms (0-100)                              | 39                   | 75 [54-82], 14-93      | 13 [11-18], 6-33       | -0.289                   | 0.074   | 31                        | 71 [54-82], 14-93           | 17 [14.5-25], 9-37     | -0.321                   | 0.078   | 46                           | 71 [54-82], 14-93      | 18.5 (8.1), 5-41        | -0.221                   | 0.140   |
| HAGOS Pain (0-100)                                  | 39                   | 80 [71-93], 20-100     | 13 [11-18], 6-33       | -0.415                   | 0.009   | 31                        | 80 [69-93], 20-100          | 17 [14.5-25], 9-37     | -0.387                   | 0.031   | 46                           | 70 [70-93], 20-100     | 18.5 (8.1), 5-41        | -0.284                   | 0.055   |
| HAGOS ADL (0-100)                                   | 39                   | 85 [68-90], 30-100     | 13 [11-18], 6-33       | -0.281                   | 0.084   | 31                        | 80 [63-90], 30-100          | 17 [14.5-25], 9-37     | -0.178                   | 0.339   | 46                           | 80 [65-90], 25-100     | 18.5 (8.1), 5-41        | -0.167                   | 0.268   |
| HAGOS Sport/Rec (0-100)                             | 39                   | 53.5 (24.5), 9-100     | 13 [11-18], 6-33       | -0.190                   | 0.247   | 31                        | 59 [39-77], 9-100           | 17 [14.5-25], 9-37     | -0.187                   | 0.314   | 45                           | 52.6 (24.1), 9-100     | 18.8 (8), 5-41          | -0.142                   | 0.353   |
| HAGOS QOL (0-100)                                   | 39                   | 67.3 (23.9), 20-100    | 13 [11-18], 6-33       | -0.140                   | 0.397   | 31                        | 70 [55-90], 20-100          | 17 [14.5-25], 9-37     | -0.025                   | 0.894   | 45                           | 65.4 (24), 20-100      | 18.8 (8), 5-41          | -0.003                   | 0.984   |
| Groin pain/discomfort same training/match of injury | 42                   |                        |                        | -0.148                   | 0.350   | 33                        |                             |                        | -0.255                   | 0.157   | 50                           |                        |                         | 0.388                    | 0.346   |
| - no                                                |                      | 36 (86%)               | 13 [11-23], 6-33       |                          |         |                           | 28 (85%)                    | 18.5 [16-27.5], 10-37  |                          |         |                              | 43 (86%)               | 19.6 (8.4), 5-41        |                          |         |
| - yes                                               |                      | 6 (14%)                | 12 [7-18], 7-19        |                          |         |                           | 5 (15%)                     | 14 [13-18], 9-24       |                          |         |                              | 7 (14%)                | 16.4 (7), 7-27          |                          |         |
| Groin pain/discomfort during week prior to injury   | 42                   |                        |                        | 0.008                    | 0.974   | 33                        |                             |                        | -0.014                   | 0.542   | 50                           |                        |                         | 0.169                    | 0.687   |
| - no                                                |                      | 35 (83%)               | 13 [11-23], 6-33       |                          |         |                           | 28 (85%)                    | 17.5 [14.5-27.5], 9-37 |                          |         |                              | 43 (86%)               | 19.4 (8.6), 5-41        |                          |         |
| - yes                                               |                      | 7 (17%)                | 13 [12.5-16.5], 7-19   |                          |         |                           | 5 (15%)                     | 16 [16-20], 13-24      |                          |         |                              | 7 (14%)                | 18 (5.5), 12-27         |                          |         |
| Acute adductor time-loss injury within previous 2m  | 42                   |                        |                        | -0.162                   | 0.307   | 33                        |                             |                        | -0.208                   | 0.260   | 50                           |                        |                         | -0.084                   | 0.569   |
| - no                                                |                      | 38 (90%)               | 13 [11-23], 6-33       |                          |         |                           | 30 (91%)                    | 17.5 [15-27], 10-37    |                          |         |                              | 46 (92%)               | 18 [13-27], 5-41        |                          |         |
| - yes                                               |                      | 4 (4%)                 | 11 [7.5-14.5], 7-15    |                          |         |                           | 3 (9%)                      | 16, 12.5-18            |                          |         |                              | 4 (8%)                 | 17.5 [12.5-20.5], 10-21 |                          |         |
| Other groin time-loss injury within previous 2m     | 42                   |                        |                        | -0.230                   | 0.143   | 33                        |                             |                        | -0.193                   | 0.364   | 50                           |                        |                         | -0.098                   | 0.600   |
| - no                                                |                      | 41 (98%)               | 13 [11-19], 6-33       |                          |         |                           | 32 (97%)                    | 17.5 [15.5-27], 9-37   |                          |         |                              | 49 (98%)               | 18 [13-27], 5-41        |                          |         |
| - yes                                               |                      | 1 (2%)                 | 7                      |                          |         |                           | 1 (3%)                      | 13                     |                          |         |                              | 1 (2%)                 | 13                      |                          |         |
| Days from injury to first treatment session (days)  | 42                   | 4 [3-5], 2-10          | 13 [11-19], 6-33       | 0.046                    | 0.774   | 33                        | 4 [3-5], 2-10               | 17 [15-27], 9-37       | -0.016                   | 0.929   | 50                           | 4 [3-5], 2-10          | 19.1 (8.2), 5-41        | -0.010                   | 0.943   |
| Compliance (%)                                      | 42                   | 89 [75-100], 31-100    | 13 [11-19], 6-33       | -0.129                   | 0.415   | 33                        | 89 [83-100], 56-100         | 17 [15-27], 9-37       | -0.167                   | 0.354   | 50                           | 89 [69-100], 0-100     | 19.1 (8.2), 5-41        | 0.004                    | 0.979   |

Distribution is reported as mean or median, with SD in round brackets and IQR in square brackets, followed by range, or n with percent of available sample. LSI = limb symmetry index. Color signify candidate variable considered for the multiple regression analysis (ps0.2), and bold font where ps0.05.

**Appendix 3:** Post hoc univariate analyses results for all examination types; patient history, clinical, MRI.

| Clinical Examination                                                                    |                      |                       |                      |                          |         |                           |                       |                        |                          |         |                              |                       |                         |                          |         |
|-----------------------------------------------------------------------------------------|----------------------|-----------------------|----------------------|--------------------------|---------|---------------------------|-----------------------|------------------------|--------------------------|---------|------------------------------|-----------------------|-------------------------|--------------------------|---------|
| Variable                                                                                | Clinically pain free |                       |                      |                          |         | Completed sports training |                       |                        |                          |         | Return to full team training |                       |                         |                          |         |
|                                                                                         | n                    | Variable distribution | CPF days             | Standardized effect size | p-value | n                         | Variable distribution | SST days               | Standardized effect size | p-value | n                            | Variable distribution | RTT days                | Standardized effect size | p-value |
| Bruising                                                                                | 42                   |                       |                      | -0.230                   | 0.143   | 33                        |                       |                        | -0.248                   | 0.182   | 50                           |                       |                         | -0.273                   | 0.049   |
| - No                                                                                    |                      | 41 (98%)              | 13 [11-19], 6-33     |                          |         |                           | 32 (97%)              | 17.5 [15.5-27], 9-37   |                          |         |                              | 48 (96%)              | 19.6 (8.1), 5-41        |                          |         |
| - Yes                                                                                   |                      | 1 (2%)                | 7                    |                          |         |                           | 1 (3%)                | 10                     |                          |         |                              | 2 (4%)                | 7, 11                   |                          |         |
| Swelling                                                                                | 42                   |                       |                      | -0.120                   | 0.449   | 33                        |                       |                        | -0.092                   | 0.609   | 50                           |                       |                         | -0.115                   | 0.780   |
| - No                                                                                    |                      | 36 (86%)              | 13 [11-23], 6-33     |                          |         |                           | 28 (85%)              | 17.5 [14.5-27.5], 9-37 |                          |         |                              | 43 (86%)              | 19 (8.1), 5-41          |                          |         |
| - Yes                                                                                   |                      | 6 (14%)               | 12.5 [10-15], 7-18   |                          |         |                           | 5 (15%)               | 17 [16-21], 10-24      |                          |         |                              | 7 (14%)               | 20 (9.4), 7-33          |                          |         |
| Adductor palpation pain                                                                 | 42                   |                       |                      | -                        | -       | 33                        |                       |                        | -                        | -       | 50                           |                       |                         | -                        | -       |
| - negative                                                                              |                      | 0 (0%)                | -                    |                          |         |                           | 0 (0%)                | -                      |                          |         |                              | 0 (0%)                | -                       |                          |         |
| - positive                                                                              |                      | 42 (100%)             | 13 [11-19], 6-33     |                          |         |                           | 33 (100%)             | 17 [15-27], 9-37       |                          |         |                              | 50 (100%)             | 19.1 (8.2), 5-41        |                          |         |
| 0° Squeeze                                                                              | 42                   |                       |                      | 0.270                    | 0.081   | 33                        |                       |                        | 0.272                    | 0.129   | 50                           |                       |                         | -0.875                   | 0.028   |
| - negative                                                                              |                      | 6 (14%)               | 11.5 [7-13], 6-15    |                          |         |                           | 5 (15%)               | 16 [10-17], 10-20      |                          |         |                              | 8 (16%)               | 13.4 (5.7), 5-22        |                          |         |
| - positive                                                                              |                      | 36 (86%)              | 13.5 [11-23], 7-33   |                          |         |                           | 28 (85%)              | 19.5 [15.5-27.5], 9-37 |                          |         |                              | 42 (84%)              | 20.3 (8.2), 7-41        |                          |         |
| 45° Squeeze                                                                             | 42                   |                       |                      | 0.088                    | 0.573   | 33                        |                       |                        | -0.034                   | 0.862   | 50                           |                       |                         | 0.120                    | 0.721   |
| - negative                                                                              |                      | 12 (29%)              | 12.5 [9-18], 6-29    |                          |         |                           | 10 (30%)              | 18.5 [13-28], 10-30    |                          |         |                              | 14 (28%)              | 19.9 (7.6), 7-31        |                          |         |
| - positive                                                                              |                      | 30 (71%)              | 13 [11-23], 7-33     |                          |         |                           | 23 (70%)              | 17 [15.5-26.5], 9-37   |                          |         |                              | 36 (72%)              | 18.9 (8.6), 5-41        |                          |         |
| Passive adductor stretch                                                                | 42                   |                       |                      | 0.091                    | 0.554   | 33                        |                       |                        | 0.241                    | 0.169   | 50                           |                       |                         | -0.012                   | 0.988   |
| - negative                                                                              |                      | 17 (40%)              | 13 [11-15], 6-29     |                          |         |                           | 13 (39%)              | 16 [13-20], 10-30      |                          |         |                              | 19 (38%)              | 19.1 (9), 7-41          |                          |         |
| - positive                                                                              |                      | 25 (60%)              | 14 [11-19], 7-33     |                          |         |                           | 20 (61%)              | 21 [16-27.5], 9-37     |                          |         |                              | 31 (62%)              | 19.2 (7.9), 5-33        |                          |         |
| Outer-range resisted adduction                                                          | 42                   |                       |                      | 0.291                    | 0.062   | 33                        |                       |                        | 0.307                    | 0.087   | 50                           |                       |                         | -0.625                   | 0.193   |
| - negative                                                                              |                      | 3 (7%)                | 7, 6-13              |                          |         |                           | 3 (9%)                | 10, 10-17              |                          |         |                              | 5 (10%)               | 14.6 (4.8), 10-22       |                          |         |
| - positive                                                                              |                      | 39 (93%)              | 13 [11-21], 7-33     |                          |         |                           | 30 (91%)              | 19 [16-27], 9-37       |                          |         |                              | 45 (90%)              | 19.7 (8.4), 5-41        |                          |         |
| FABER test                                                                              | 42                   |                       |                      | 0.071                    | 0.652   | 33                        |                       |                        | 0.035                    | 0.858   | 50                           |                       |                         | -0.072                   | 0.827   |
| - negative                                                                              |                      | 31 (74%)              | 13 [10.5-20.5], 6-33 |                          |         |                           | 24 (73%)              | 17 [13.5-27.5], 9-37   |                          |         |                              | 37 (74%)              | 19 (8.4), 5-41          |                          |         |
| - positive                                                                              |                      | 11 (26%)              | 14 [12-17.5], 7-25   |                          |         |                           | 9 (27%)               | 18 [16-24], 13-30      |                          |         |                              | 13 (26%)              | 19.6 (8), 7-33          |                          |         |
| Number of positive adductor tests (0-6)                                                 | 42                   | 4.5 [4-5], 1-6        | 13 [11-19], 6-33     | 0.182                    | 0.248   | 33                        | 4 [4-6], 1-6          | 17 [15-27], 9-37       | 0.218                    | 0.223   | 50                           | 4.5 [4-5], 1-6        | 19.1 (8.2), 5-41        | 0.118                    | 0.416   |
| Palpation pain in abdominal muscle group                                                | 42                   |                       |                      | 0.160                    | 0.429   | 33                        |                       |                        | 0.128                    | 0.606   | 50                           |                       |                         | -0.056                   | 0.720   |
| - No                                                                                    |                      | 41 (98%)              | 13 [11-18], 6-33     |                          |         |                           | 32 (97%)              | 17 [14.5-27], 9-37     |                          |         |                              | 48 (96%)              | 18 [13-26.5], 5-41      |                          |         |
| - Yes                                                                                   |                      | 1 (2%)                | 23                   |                          |         |                           | 1 (3%)                | 26                     |                          |         |                              | 2 (4%)                | 17, 7-27                |                          |         |
| Resistance/stretch pain in abdominal muscle group                                       | 42                   |                       |                      | 0.174                    | 0.275   | 33                        |                       |                        | 0.026                    | 0.909   | 50                           |                       |                         | 0.104                    | 0.482   |
| - No                                                                                    |                      | 39 (93%)              | 13 [11-18], 6-33     |                          |         |                           | 31 (94%)              | 17 [14.5-27], 9-37     |                          |         |                              | 47 (94%)              | 18 [12.5-26.5], 5-41    |                          |         |
| - Yes                                                                                   |                      | 3 (7%)                | 19 [16-21], 13-23    |                          |         |                           | 2 (6%)                | 21, 16-26              |                          |         |                              | 3 (6%)                | 22, 16-27               |                          |         |
| Palpation pain in hip flexor muscle group                                               | 42                   |                       |                      | 0.036                    | 0.820   | 33                        |                       |                        | -0.053                   | 0.707   | 50                           |                       |                         | 0.020                    | 0.904   |
| - No                                                                                    |                      | 38 (90%)              | 13 [11-19], 6-33     |                          |         |                           | 29 (88%)              | 17 [15-27], 9-37       |                          |         |                              | 46 (92%)              | 18 [13-27], 5-41        |                          |         |
| - Yes                                                                                   |                      | 4 (10%)               | 14 [10.5-19.5], 8-24 |                          |         |                           | 4 (12%)               | 18 [13-24.5], 10-29    |                          |         |                              | 4 (8%)                | 18.5 [13.5-25.5], 11-30 |                          |         |
| Resistance/stretch pain in hip flexor muscle group                                      | 42                   |                       |                      | 0.330                    | 0.033   | 33                        |                       |                        | 0.308                    | 0.081   | 50                           |                       |                         | -0.452                   | 0.141   |
| - No                                                                                    |                      | 28 (67%)              | 12 [9.5-15.5], 6-29  |                          |         |                           | 23 (70%)              | 16 [13.5-22.5], 10-30  |                          |         |                              | 34 (68%)              | 18 (7.2), 5-32          |                          |         |
| - Yes                                                                                   |                      | 14 (33%)              | 17 [13-23], 7-33     |                          |         |                           | 10 (30%)              | 25 [20-28], 9-37       |                          |         |                              | 16 (32%)              | 21.7 (10), 7-41         |                          |         |
| Palpation pain at AL insertion                                                          | 42                   |                       |                      | -                        | -       | 33                        |                       |                        | -                        | -       | 50                           |                       |                         | -                        | -       |
| - no                                                                                    |                      | 42 (100%)             | 13 [11-19], 6-33     |                          |         |                           | 33 (100%)             | 17 [15-27], 9-37       |                          |         |                              | 50 (100%)             | 19.1 (8.2), 5-41        |                          |         |
| - yes                                                                                   |                      | 0 (0%)                | -                    |                          |         |                           | 0 (0%)                | -                      |                          |         |                              | 0 (0%)                | -                       |                          |         |
| Distance of proximal AL palpation pain from pubic insertion, when not at insertion (cm) | 40                   | 4 [2.5-5], 0.5-11.5   | 13 [11-21], 6-33     | -0.102                   | 0.533   | 32                        | 4.2 (2.4), 0.5-9      | 17 [14.5-27], 9-37     | -0.126                   | 0.492   | 48                           | 3.8 [2.5-5], 0.5-11.5 | 19.4 (8.2), 5-41        | -0.112                   | 0.448   |
| Length of AL palpation pain (cm)                                                        | 40                   | 6 [4-8.3], 1-23       | 13 [11-21], 6-33     | 0.207                    | 0.199   | 32                        | 6 [4-8.5], 1-23       | 17 [14.5-27], 9-37     | 0.160                    | 0.381   | 48                           | 6 [4-8.3], 1-23       | 19.4 (8.2), 5-41        | -0.002                   | 0.989   |
| Width of AL palpation pain (cm)                                                         | 40                   | 3 [2.3-5.5], 1-7.5    | 13 [11-21], 6-33     | 0.228                    | 0.157   | 32                        | 3 [2.3-5.5], 1-7.5    | 17 [14.5-27], 9-37     | 0.103                    | 0.576   | 48                           | 3 [2.5-5], 1-7.5      | 19.4 (8.2), 5-41        | 0.035                    | 0.815   |
| Palpable defect                                                                         | 42                   |                       |                      | -                        | -       | 33                        |                       |                        | -                        | -       | 50                           |                       |                         | -                        | -       |
| - no                                                                                    |                      | 42 (100%)             | 13 [11-19], 6-33     |                          |         |                           | 33 (100%)             | 17 [15-27], 9-37       |                          |         |                              | 50 (100%)             | 19.1 (8.2), 5-41        |                          |         |
| - yes                                                                                   |                      | 0 (0%)                | -                    |                          |         |                           | 0 (0%)                | -                      |                          |         |                              | 0 (0%)                | -                       |                          |         |
| Ability to perform eccentric adduction strength test                                    | 41                   |                       |                      | 0.373                    | 0.016   | 32                        |                       |                        | -0.415                   | 0.018   | 49                           |                       |                         | 1.006                    | 0.004   |
| - No (pain/apprehension)                                                                |                      | 11 (27%)              | 18 [15.5-23], 11-25  |                          |         |                           | 10 (31%)              | 25.5 [21-28], 16-30    |                          |         |                              | 12 (24%)              | 25.1 (7.5), 9-33        |                          |         |
| - Yes                                                                                   |                      | 30 (73%)              | 12 [10-15], 6-33     |                          |         |                           | 22 (69%)              | 16 [13-21], 9-37       |                          |         |                              | 37 (76%)              | 17.4 (7.7), 5-41        |                          |         |
| Eccentric adduction strength LSI (%)                                                    | 30                   | 73.2 (16.7), 23-97    | 12 [10-15], 6-33     | -0.443                   | 0.014   | 22                        | 72 (18), 23-97        | 16 [13-21], 9-37       | -0.377                   | 0.083   | 37                           | 76.3 (18.9), 23-102   | 17.4 (7.7), 5-41        | -0.181                   | 0.285   |
| ADD/ABD strength ratio on injured leg (%)                                               | 30                   | 86.5 (21.8), 45-119   | 12 [10-15], 6-33     | -0.384                   | 0.036   | 22                        | 86.6 (21.1), 45-119   | 16 [13-21], 9-37       | -0.278                   | 0.211   | 37                           | 90 [72-98], 25-119    | 17.4 (7.7), 5-41        | -0.234                   | 0.163   |
| Hip abduction ROM LSI (%)                                                               | 42                   | 94.6 [67-103], 31-144 | 13 [11-19], 6-33     | -0.334                   | 0.031   | 33                        | 87.3 [23.1], 42-133   | 17 [15-27], 9-37       | -0.347                   | 0.048   | 50                           | 95.1 [67-103], 27-144 | 19.1 (8.2), 5-41        | -0.169                   | 0.241   |
| Bent Knee Fall Out test LSI (%)                                                         | 42                   | 96.4 (28.9), 11-175   | 13 [11-19], 6-33     | -0.200                   | 0.205   | 33                        | 94.9 (28.2), 11-140   | 17 [15-27], 9-37       | -0.211                   | 0.239   | 50                           | 94.8 (28), 11-175     | 19.1 (8.2), 5-41        | -0.075                   | 0.603** |

Distribution is reported as mean or median, with SD in round brackets and IQR in square brackets, followed by range, or n with percent of available sample. LSI = limb symmetry index. Color signify candidate variable considered for the multiple regression analysis (ps0.2), and bold font where ps0.05.

**Appendix 3:** Post hoc univariate analyses results for all examination types; patient history, clinical, MRI.

| MRI                                                             |                      |                         |                      |                          |         |                           |                         |                        |                          |         |                              |                          |                      |                          |         |
|-----------------------------------------------------------------|----------------------|-------------------------|----------------------|--------------------------|---------|---------------------------|-------------------------|------------------------|--------------------------|---------|------------------------------|--------------------------|----------------------|--------------------------|---------|
| Variable                                                        | Clinically pain free |                         |                      |                          |         | Completed sports training |                         |                        |                          |         | Return to full team training |                          |                      |                          |         |
|                                                                 | n                    | Variable distribution   | CPF days             | Standardized effect size | p-value | n                         | Variable distribution   | SST days               | Standardized effect size | p-value | n                            | Variable distribution    | RTT days             | Standardized effect size | p-value |
| Number of adductor muscle injuries                              | 42                   |                         |                      | 0.165                    | 0.296   | 33                        |                         |                        | 0.230                    | 0.198   | 50                           |                          |                      | 0.224                    | 0.117   |
| - 0                                                             |                      | 9 (21%)                 | 13 [11-14], 6-23     |                          |         |                           | 7 (21%)                 | 16 [15.5-19], 10-27    |                          |         |                              | 10 (20%)                 | 17.5 [12-20], 5-27   |                          |         |
| - 1                                                             |                      | 31 (74%)                | 13 [10.5-21], 7-33   |                          |         |                           | 24 (73%)                | 17 [13.5-27.5], 9-37   |                          |         |                              | 38 (76%)                 | 17.5 [13-27], 7-41   |                          |         |
| - 2                                                             |                      | 1 (2%)                  | 29                   |                          |         |                           | 1 (3%)                  | 30                     |                          |         |                              | 1 (2%)                   | 29                   |                          |         |
| - 3                                                             |                      | 1 (2%)                  | 15                   |                          |         |                           | 1 (3%)                  | 21                     |                          |         |                              | 1 (2%)                   | 33                   |                          |         |
| - 4/5/6                                                         |                      | 0 (0%)                  | -                    |                          |         |                           | 0 (0%)                  | -                      |                          |         |                              | 0 (0%)                   | -                    |                          |         |
| Muscle(s) involved                                              | 42                   |                         |                      | -                        | 0.230   | 33                        |                         |                        | -                        | 0.188   | 50                           |                          |                      | -                        | 0.060   |
| - no adductor injury                                            |                      | 9 (21%)                 | 13 [11-14], 6-23     |                          |         |                           | 7 (21%)                 | 16 [15.5-19], 10-27    |                          |         |                              | 10 (20%)                 | 17.5 [12-20], 5-27   |                          |         |
| - isolated AL                                                   |                      | 26 (62%)                | 12 [8-19], 7-33      |                          |         |                           | 21 (64%)                | 17 [13-26], 9-37       |                          |         |                              | 33 (66%)                 | 16 [13-25], 7-32     |                          |         |
| - AL & other adductor muscle                                    |                      | 2 (5%)                  | 22, 15-29            |                          |         |                           | 2 (6%)                  | 25.5, 21-30            |                          |         |                              | 2 (4%)                   | 31, 29-33            |                          |         |
| - other adductor muscle than AL                                 |                      | 5 (12%)                 | 18 [15-25], 10-28    |                          |         |                           | 3 (9%)                  | 28, 20-30              |                          |         |                              | 5 (10%)                  | 31 [21-31], 7-41     |                          |         |
| Primary adductor muscle injury                                  | 33                   |                         |                      | -                        | 0.622   | 26                        |                         |                        | -                        | 0.388   | 40                           |                          |                      | -                        | 0.324   |
| - Adductor longus                                               |                      | 28 (85%)                | 12.5 [9.5-21], 7-33  |                          |         |                           | 23 (89%)                | 17 [13.5-26.5], 9-37   |                          |         |                              | 35 (88%)                 | 17 [13-26.5], 7-33   |                          |         |
| - Adductor brevis                                               |                      | 2 (6%)                  | 20, 15-25            |                          |         |                           | 2 (8%)                  | 25, 20-30              |                          |         |                              | 2 (5%)                   | 26, 21-31            |                          |         |
| - Adductor magnus                                               |                      | 1 (3%)                  | 18                   |                          |         |                           | 1 (4%)                  | 28                     |                          |         |                              | 1 (3%)                   | 28                   |                          |         |
| - Pectineus                                                     |                      | 2 (6%)                  | 19, 10-28            |                          |         |                           | 0 (0%)                  | -                      |                          |         |                              | 2 (5%)                   | 24, 7-41             |                          |         |
| - Gracilis                                                      |                      | 0 (0%)                  |                      |                          |         |                           | 0 (0%)                  | -                      |                          |         |                              | 0 (0%)                   | -                    |                          |         |
| - Obturator externus                                            |                      | 0 (0%)                  |                      |                          |         |                           | 0 (0%)                  | -                      |                          |         |                              | 0 (0%)                   | -                    |                          |         |
| Highest injury grading                                          | 42                   |                         |                      | 0.103                    | 0.517   | 33                        |                         |                        | 0.204                    | 0.255   | 50                           |                          |                      | 0.039                    | 0.789   |
| - 0                                                             |                      | 9 (21%)                 | 13 [11-14], 6-23     |                          |         |                           | 7 (21%)                 | 16 [15.5-19], 10-27    |                          |         |                              | 10 (20%)                 | 17.5 [12-20], 5-27   |                          |         |
| - 1                                                             |                      | 15 (36%)                | 13 [11.5-16.5], 7-33 |                          |         |                           | 12 (36%)                | 17.5 [13-24.5], 9-37   |                          |         |                              | 17 (34%)                 | 20 [16-26], 7-41     |                          |         |
| - 2                                                             |                      | 18 (43%)                | 14.5 [10-23], 7-29   |                          |         |                           | 14 (42%)                | 24 [14-29], 10-30      |                          |         |                              | 23 (46%)                 | 16 [12.5-27], 7-32   |                          |         |
| - 3                                                             |                      | 0 (0%)                  | -                    |                          |         |                           | 0 (0%)                  | -                      |                          |         |                              | 0 (0%)                   | -                    |                          |         |
| Injury location                                                 | 31                   |                         |                      | -0.242                   | 0.258   | 25                        |                         |                        | -0.265                   | 0.240   | 38                           |                          |                      | -0.237                   | 0.158   |
| - bone-tendon junction (BTJ)                                    |                      | 1 (3%)                  | 25                   |                          |         |                           | 1 (4%)                  | 30                     |                          |         |                              | 1 (3%)                   | 31                   |                          |         |
| - musculotendinous junction (MTJ)                               |                      | 30 (97%)                | 12.5 [10-18], 7-33   |                          |         |                           | 24 (96%)                | 17.5 [13.5-27.5], 9-37 |                          |         |                              | 37 (97%)                 | 17 [13-26], 7-33     |                          |         |
| Additional injury in abdominal muscle group                     | 42                   |                         |                      | -                        | -       | 33                        |                         |                        | -                        | -       | 50                           |                          |                      | -                        | -       |
| - No                                                            |                      | 42 (100%)               | 13 [11-19], 6-33     |                          |         |                           | 33 (100%)               | 17 [15-27], 9-37       |                          |         |                              | 50 (100%)                | 19.1 (8.2), 5-41     |                          |         |
| - Yes                                                           |                      | 0 (0%)                  | -                    |                          |         |                           | 0 (0%)                  | -                      |                          |         |                              | 0 (0%)                   | -                    |                          |         |
| Additional injury in hip flexor muscle group                    | 42                   |                         |                      | 0.082                    | 0.632   | 33                        |                         |                        | 0.112                    | 0.545   | 50                           |                          |                      | 0.109                    | 0.472   |
| - No                                                            |                      | 40 (95%)                | 13 [11-18.5], 6-33   |                          |         |                           | 31 (94%)                | 17 [14.5-26.5], 9-37   |                          |         |                              | 48 (96%)                 | 18 [12.5-26.5], 5-41 |                          |         |
| - Yes (sartorius)                                               |                      | 2 (5%)                  | 20, 11-29            |                          |         |                           | 2 (6%)                  | 23, 16-30              |                          |         |                              | 2 (4%)                   | 23 [17-29], 17-29    |                          |         |
| Additional injury in other muscle group                         | 42                   |                         |                      | 0.037                    | 0.839   | 33                        |                         |                        | 0.066                    | 0.742   | 50                           |                          |                      | -0.078                   | 0.614   |
| - No                                                            |                      | 40 (95%)                | 13 [11-21], 6-33     |                          |         |                           | 31 (94%)                | 17 [14.5-26.5], 9-37   |                          |         |                              | 47 (94%)                 | 18 [13.5-26.5], 5-41 |                          |         |
| - Yes (vastus medialis)                                         |                      | 2 (5%)                  | 15 [12-18], 12-18    |                          |         |                           | 2 (6%)                  | 22, 16-28              |                          |         |                              | 3 (6%)                   | 13, 7-31             |                          |         |
| For adductor longus injuries only:                              |                      |                         |                      |                          |         |                           |                         |                        |                          |         |                              |                          |                      |                          |         |
| Proximal intramuscular edema distance from pubic insertion (mm) | 28                   | 70 (32.6), 16-124       | 12.5 [9.5-21], 7-33  | -0.091                   | 0.647   | 23                        | 66.6 (31.7), 16-124     | 17 [13.5-26.5], 9-37   | -0.231                   | 0.290   | 35                           | 63.5 (35), 16-145        | 18.9 (7.6), 7-33     | -0.212                   | 0.221   |
| Peripheral fluid thickness (mm)                                 | 28                   | 3.9 (3), 0-11           | 12.5 [9.5-21], 7-33  | 0.017                    | 0.933   | 23                        | 3.8 (3.1), 0-11         | 17 [13.5-26.5], 9-37   | -0.123                   | 0.575   | 35                           | 3 [2-6], 0-11            | 18.9 (7.6), 7-33     | -0.169                   | 0.331   |
| Proximal-distal intramuscular edema extent (mm)                 | 28                   | 67 [47-81], 23-166      | 12.5 [9.5-21], 7-33  | 0.293                    | 0.131   | 23                        | 68 [53-80], 23-166      | 17 [13.5-26.5], 9-37   | 0.396                    | 0.062   | 35                           | 72 [53-82], 23-166       | 18.9 (7.6), 7-33     | 0.138                    | 0.428   |
| Medial-lateral intramuscular edema extent (mm)                  | 28                   | 31.9 (13.5), 7-58       | 12.5 [9.5-21], 7-33  | 0.181                    | 0.358   | 23                        | 31.7 (14.5), 7-58       | 17 [13.5-26.5], 9-37   | 0.249                    | 0.252   | 35                           | 30.4 (12.9), 7-58        | 18.9 (7.6), 7-33     | 0.295                    | 0.085   |
| Anterior-posterior intramuscular edema extent (mm)              | 28                   | 22.6 (10.4), 8-48       | 12.5 [9.5-21], 7-33  | 0.085                    | 0.668   | 23                        | 23.6 (11), 4-48         | 17 [13.5-26.5], 9-37   | -0.026                   | 0.907   | 35                           | 23.6 (10.8), 8-48        | 18.9 (7.6), 7-33     | -0.030                   | 0.863   |
| Intramuscular edema CSA index (%)                               | 28                   | 32.1 (20.2), 2-77       | 12.5 [9.5-21], 7-33  | 0.254                    | 0.192   | 23                        | 32.9 (20.7), 2-77       | 17 [13.5-26.5], 9-37   | 0.215                    | 0.324   | 35                           | 32.5 (19.4), 2-77        | 18.9 (7.6), 7-33     | 0.176                    | 0.312   |
| MTJ injury location                                             | 27                   |                         |                      | 0.005                    | 1.000   | 22                        |                         |                        | -0.022                   | 0.948   | 34                           |                          |                      | 0.342                    | 0.327   |
| - proximal MTJ                                                  |                      | 13 (48%)                | 13 [11-18], 7-33     |                          |         |                           | 9 (41%)                 | 17 [16-24], 10-37      |                          |         |                              | 15 (44%)                 | 20.1 (6.9), 11-33    |                          |         |
| - distal MTJ                                                    |                      | 14 (52%)                | 12 [8-23], 7-29      |                          |         |                           | 13 (59%)                | 17 [13-27], 9-30       |                          |         |                              | 19 (56%)                 | 17.5 (8.1), 7-32     |                          |         |
| Intramuscular collection/disruption CSA index (%)               | 17                   | 5 [3-9], 1-25           | 16 [11-23], 7-29     | -0.292                   | 0.255   | 14                        | 5 [3-9], 1-25           | 24 [14-29], 10-30      | -0.414                   | 0.141   | 22                           | 5 [3-9], 1-25            | 17.5 [13-27], 7-32   | -0.208                   | 0.354   |
| Intramuscular collection/disruption volume (cm³)                | 17                   | 1.5 [0.6-4.3], 0.3-23.7 | 16 [11-23], 7-29     | -0.250                   | 0.334   | 14                        | 1.5 [0.6-2.7], 0.4-23.7 | 24 [14-29], 10-30      | -0.350                   | 0.221   | 22                           | 1.5 [0.6-4.3], 0.02-23.7 | 17.5 [13-27], 7-32   | -0.142                   | 0.528   |
| Intramuscular tendon disruption (grade 2 only)                  | 17                   |                         |                      | -0.127                   | 0.618   | 14                        |                         |                        | -                        | -       | 22                           |                          |                      | -0.012                   | 0.952   |
| - no                                                            |                      | 15 (88%)                | 16 [11.5-23.5], 7-29 |                          |         |                           | 14 (100%)               | 24 [14-29], 10-30      |                          |         |                              | 20 (91%)                 | 17.5 [12.5-27], 7-32 |                          |         |
| - yes                                                           |                      | 2 (12%)                 | 13.5, 8-19           |                          |         |                           | 0 (0%)                  | -                      |                          |         |                              | 2 (9%)                   | 18.5, 15-22          |                          |         |

Distribution is reported as mean or median, with SD in round brackets and IQR in square brackets, followed by range, or n with percent of available sample. CSA = cross sectional area. *Color signify candidate variable considered for the multiple regression analysis (p≤0.2), and bold font where p≤0.05.*
