# Supplementary material
Source: publisher figshare collection journal article supplement (https://sage.figshare.com/ndownloader/files/22046715)
Supplement: Supplementary file 3 [file 22046715]

## Appendix 1: Univariate analyses results for all examination types; history, clinical, and MRI.

| Patient history                                     |                      |                          |                        |                          |         |                           |                          |                     |                          |         |                              |                          |                         |                          |         |
|-----------------------------------------------------|----------------------|--------------------------|------------------------|--------------------------|---------|---------------------------|--------------------------|---------------------|--------------------------|---------|------------------------------|--------------------------|-------------------------|--------------------------|---------|
| Variable                                            | Clinically pain free |                          |                        |                          |         | Completed sports training |                          |                     |                          |         | Return to full team training |                          |                         |                          |         |
|                                                     | n                    | Variable distribution    | CPF days               | Standardized effect size | p-value | n                         | Variable distribution    | SST days            | Standardized effect size | p-value | n                            | Variable distribution    | RTT days                | Standardized effect size | p-value |
| Age (y)                                             | 59                   | 26.2 (4.4), 20-37        | 15 [11.5-27.5], 6-79   | 0.174                    | 0.188   | 49                        | 26.4 (4.5), 20-37        | 24 [16-32], 9-117   | 0.082                    | 0.576   | 73                           | 25.9 (4.3), 18-37        | 22 [15-31], 5-112       | 0.043                    | 0.718   |
| Height (cm)                                         | 59                   | 180.8 (9.6), 162-210     | 15 [11.5-27.5], 6-79   | -0.142                   | 0.285   | 49                        | 180.8 (9.3), 162-203     | 24 [16-32], 9-117   | -0.141                   | 0.334   | 73                           | 180 (9.1), 162-210       | 22 [15-31], 5-112       | -0.100                   | 0.400   |
| Weight (kg)                                         | 59                   | 78.5 (13.5), 47-109      | 15 [11.5-27.5], 6-79   | -0.156                   | 0.237   | 49                        | 80.0 (13.5), 47-108      | 24 [16-32], 9-117   | -0.239                   | 0.098   | 73                           | 77.6 (13.3), 47-109      | 22 [15-31], 5-112       | -0.096                   | 0.420   |
| BMI (kg/m²)                                         | 59                   | 23.8 (2.3), 18-31        | 15 [11.5-27.5], 6-79   | -0.138                   | 0.297   | 49                        | 24.0 (2.4), 18-31        | 24 [16-32], 9-117   | -0.282                   | 0.049   | 73                           | 23.8 (2.4), 18-31        | 22 [15-31], 5-112       | -0.114                   | 0.338   |
| Type of sport                                       | 59                   |                          |                        | -                        | 0.932   | 49                        |                          |                     | -                        | 0.642   | 73                           |                          |                         | -                        | 0.268   |
| - football                                          |                      | 34 (58%)                 | 15 [12-27], 7-73       |                          |         |                           | 28 (57%)                 | 25 [16-39.5], 10-89 |                          |         |                              | 42 (58%)                 | 24 [15-37], 7-112       |                          |         |
| - futsal                                            |                      | 12 (20%)                 | 15 [12.5-26], 6-44     |                          |         |                           | 11 (22%)                 | 24 [16-28.5], 10-64 |                          |         |                              | 16 (22%)                 | 22 [12-27], 5-57        |                          |         |
| - other                                             |                      | 13 (22%)                 | 13 [11-28], 7-79       |                          |         |                           | 10 (20%)                 | 16.5 [13-37], 9-117 |                          |         |                              | 15 (21%)                 | 18 [14.5-28.5], 10-99   |                          |         |
| Injury mechanism                                    | 59                   |                          |                        | -                        | 0.950   | 49                        |                          |                     | -                        | 0.977   | 73                           |                          |                         | -                        | 0.719   |
| - kicking                                           |                      | 12 (20%)                 | 13.5 [12-27.5], 8-73   |                          |         |                           | 11 (22%)                 | 18 [16-47], 10-89   |                          |         |                              | 16 (22%)                 | 24 [17-44], 7-97        |                          |         |
| - change of direction                               |                      | 17 (29%)                 | 23 [12-28], 6-75       |                          |         |                           | 16 (33%)                 | 24 [15-43.5], 9-78  |                          |         |                              | 20 (27%)                 | 25 [14.5-36], 7-96      |                          |         |
| - reaching                                          |                      | 11 (19%)                 | 17 [10-28], 8-33       |                          |         |                           | 9 (18%)                  | 24 [16-32], 13-37   |                          |         |                              | 14 (19%)                 | 17.5 [15-27], 12-112    |                          |         |
| - other                                             |                      | 19 (32%)                 | 13 [11-23.5], 7-79     |                          |         |                           | 13 (27%)                 | 24 [17-30], 10-117  |                          |         |                              | 23 (32%)                 | 22 [12.5-30.5], 5-99    |                          |         |
| Maximum pain at injury onset (0-10)                 | 59                   | 7 [6.5-9], 3-10          | 15 [11.5-27.5], 6-79   | 0.469                    | <0.001  | 49                        | 7 [6-9], 4-10            | 24 [16-32], 9-117   | 0.551                    | <0.001  | 73                           | 7 [6-8], 3-10            | 22 [15-31], 5-112       | 0.401                    | <0.001  |
| Discontinuation of sport within 5 min               | 59                   |                          |                        | 0.177                    | 0.174   | 49                        |                          |                     | 0.198                    | 0.165   | 73                           |                          |                         | 0.340                    | 0.004   |
| - no                                                |                      | 15 (25%)                 | 13 [10.5-20.5], 7-40   |                          |         |                           | 12 (24%)                 | 16 [14.5-30], 10-57 |                          |         |                              | 20 (27%)                 | 15 [12-19], 5-93        |                          |         |
| - yes                                               |                      | 44 (75%)                 | 17 [12-28.5], 6-79     |                          |         |                           | 37 (76%)                 | 26 [16-34], 9-117   |                          |         |                              | 53 (73%)                 | 26 [16-35], 7-112       |                          |         |
| "Popping" sound at injury time                      | 53                   |                          |                        | 0.217                    | 0.115   | 44                        |                          |                     | 0.204                    | 0.153   | 66                           |                          |                         | 0.216                    | 0.079   |
| - no                                                |                      | 39 (73%)                 | 13 [11-23.5], 7-79     |                          |         |                           | 32 (73%)                 | 18.5 [16-30], 9-117 |                          |         |                              | 48 (73%)                 | 20.5 [14.5-38], 5-112   |                          |         |
| - yes                                               |                      | 14 (27%)                 | 21.5 [13-40], 6-75     |                          |         |                           | 12 (27%)                 | 28 [17-63], 10-89   |                          |         |                              | 34 [15-73], 9-97         |                         |                          |         |
| Walking pain (0-10)                                 | 59                   | 0 [0-4], 0-8             | 15 [11.5-27.5], 6-79   | 0.480                    | <0.001  | 49                        | 1 [0-4], 0-8             | 24 [16-32], 9-117   | 0.453                    | 0.001   | 73                           | 1 [0-4], 0-8             | 22 [15-31], 5-112       | 0.412                    | <0.001  |
| Dominant leg injured                                | 58                   |                          |                        | -0.043                   | 0.743   | 48                        |                          |                     | -0.138                   | 0.338   | 72                           |                          |                         | -0.019                   | 0.869   |
| - no                                                |                      | 27 (47%)                 | 17 [11.5-28], 6-79     |                          |         |                           | 21 (44%)                 | 27 [20-32], 10-117  |                          |         |                              | 32 (44%)                 | 25 [14.5-32], 7-112     |                          |         |
| - yes                                               |                      | 31 (53%)                 | 13 [11.5-26.5], 7-75   |                          |         |                           | 27 (56%)                 | 17 [16-33.5], 9-89  |                          |         |                              | 40 (56%)                 | 21.5 [14.5-31.5], 5-97  |                          |         |
| Coughing pain                                       | 59                   |                          |                        | 0.349                    | 0.007   | 49                        |                          |                     | 0.402                    | 0.005   | 73                           |                          |                         | 0.237                    | 0.043   |
| - no                                                |                      | 52 (88%)                 | 13.5 [11-24], 6-79     |                          |         |                           | 44 (90%)                 | 20.5 [16-30], 9-117 |                          |         |                              | 66 (90%)                 | 20.5 [14-31], 5-112     |                          |         |
| - yes                                               |                      | 7 (12%)                  | 40 [22-58], 13-73      |                          |         |                           | 5 (10%)                  | 66 [57-66], 30-89   |                          |         |                              | 7 (10%)                  | 67 [26.5-70.5], 12-97   |                          |         |
| HAGOS Symptoms (0-100)                              | 56                   | 66.1 [46.4-78.6], 0-92.9 | 14.5 [11.5-28.5], 6-79 | -0.555                   | <0.001  | 47                        | 60.7 [42.9-78.6], 0-92.9 | 21 [16-33], 9-117   | -0.611                   | <0.001  | 67                           | 64.3 [42.9-78.6], 0-92.9 | 21 [14-31], 5-99        | -0.510                   | <0.001  |
| HAGOS Pain (0-100)                                  | 56                   | 77.5 [65-87.5], 20-100   | 14.5 [11.5-28.5], 6-79 | -0.572                   | <0.001  | 47                        | 75 [57.5-86.3], 20-100   | 21 [16-33], 9-117   | -0.591                   | <0.001  | 67                           | 75 [55-86.3], 20-100     | 21 [14-31], 5-99        | -0.488                   | <0.001  |
| HAGOS ADL (0-100)                                   | 56                   | 77.5 [62.5-90], 10-100   | 14.5 [11.5-28.5], 6-79 | -0.462                   | <0.001  | 47                        | 75 [55-87.5], 10-100     | 21 [16-33], 9-117   | -0.497                   | <0.001  | 67                           | 75 [55-87.5], 10-100     | 21 [14-31], 5-99        | -0.386                   | 0.001   |
| HAGOS Sport/Rec (0-100)                             | 56                   | 49.8 (23.8), 6.3-100     | 14.5 [11.5-28.5], 6-79 | -0.367                   | 0.005   | 47                        | 49.9 (24.5), 6.3-100     | 21 [16-33], 9-117   | -0.440                   | 0.002   | 66                           | 47.7 (24.2), 3.1-100     | 21 [14-31], 5-99        | -0.366                   | 0.003   |
| HAGOS QOL (0-100)                                   | 56                   | 61.7 (25.7), 10-100      | 14.5 [11.5-28.5], 6-79 | -0.404                   | 0.002   | 47                        | 61.8 (25.9), 10-100      | 21 [16-33], 9-117   | -0.488                   | 0.001   | 66                           | 58.6 (26.3), 10-100      | 21 [14-31], 5-99        | -0.329                   | 0.007   |
| Groin pain/discomfort same training/match of injury | 59                   |                          |                        | 0.093                    | 0.477   | 49                        |                          |                     | 0.078                    | 0.584   | 73                           |                          |                         | 0.062                    | 0.597   |
| - no                                                |                      | 48 (81%)                 | 14 [11-24.5], 6-79     |                          |         |                           | 39 (80%)                 | 21 [16-30], 10-117  |                          |         |                              | 61 (84%)                 | 21 [15-31], 5-112       |                          |         |
| - yes                                               |                      | 11 (19%)                 | 19 [12-30.5], 7-61     |                          |         |                           | 10 (20%)                 | 29 [14-57], 9-72    |                          |         |                              | 12 (16%)                 | 24.5 [14.5-59], 7-75    |                          |         |
| Groin pain/discomfort during week prior to injury   | 59                   |                          |                        | 0.113                    | 0.386   | 49                        |                          |                     | 0.074                    | 0.605   | 73                           |                          |                         | 0.054                    | 0.643   |
| - no                                                |                      | 48 (81%)                 | 14 [11-26.], 6-79      |                          |         |                           | 40 (82%)                 | 22.5 [16-30], 9-117 |                          |         |                              | 62 (85%)                 | 21.5 [15-31], 5-112     |                          |         |
| - yes                                               |                      | 11 (19%)                 | 18 [13-28.5], 7-61     |                          |         |                           | 9 (18%)                  | 24 [16-45], 13-66   |                          |         |                              | 11 (15%)                 | 22 [15.5-43], 12-73     |                          |         |
| Acute adductor time-loss injury within previous 2m  | 59                   |                          |                        | -0.197                   | 0.131   | 49                        |                          |                     | -0.227                   | 0.112   | 73                           |                          |                         | -0.148                   | 0.207   |
| - no                                                |                      | 55 (93%)                 | 16 [12-28.5], 6-79     |                          |         |                           | 46 (94%)                 | 25 [16-34], 10-117  |                          |         |                              | 69 (95%)                 | 22 [15-32], 5-112       |                          |         |
| - yes                                               |                      | 4 (7%)                   | 11 [7.5-14.5], 7-15    |                          |         |                           | 3 (6%)                   | 16, 9-20            |                          |         |                              | 4 (5%)                   | 17.5 [12.5-20.5], 10-21 |                          |         |
| Other groin time-loss injury within previous 2m     | 59                   |                          |                        | -0.041                   | 0.753   | 49                        |                          |                     | -0.022                   | 0.879   | 73                           |                          |                         | 0.067                    | 0.569   |
| - no                                                |                      | 57 (97%)                 | 15 [12-27], 6-79       |                          |         |                           | 47 (96%)                 | 24 [16-31], 9-117   |                          |         |                              | 70 (96%)                 | 21.5 [15-31], 5-112     |                          |         |
| - yes                                               |                      | 2 (3%)                   | 7, 30                  |                          |         |                           | 2 (4%)                   | 13, 45              |                          |         |                              | 3 (4%)                   | 31, 14-51               |                          |         |
| Days from injury to first treatment session (days)  | 59                   | 4 [3-6], 2-10            | 15 [11.5-27.5], 6-79   | -0.039                   | 0.768   | 49                        | 4 [3-6], 2-10            | 24 [16-32], 9-117   | -0.046                   | 0.751   | 72                           | 4 [3-6], 2-10            | 22 [15-31.5], 5-112     | 0.007                    | 0.955   |
| Compliance (%)                                      | 59                   | 88.2 [75.3-100], 31-100  | 15 [11.5-27.5], 6-79   | -0.284                   | 0.029   | 49                        | 88.9 [76.7-100], 56-100  | 24 [16-32], 9-117   | -0.381                   | 0.007   | 73                           | 86.7 [68.8-100], 0-100   | 22 [15-31], 5-112       | -0.104                   | 0.380   |

Distribution is reported as mean or median, with SD in round brackets and IQR in square brackets, followed by range, or n with percent of available sample. LSI = limb symmetry index. Color signify candidate variable considered for the multiple regression analysis (p≤0.2), and bold font where p≤0.05.

## Appendix 1: Univariate analyses results for all examination types; history, clinical, and MRI.

| Clinical Examination                                                                      |                      |                       |                                              |                          |         |                           |                       |                                              |                          |         |                              |                        |                                            |                          |         |
|-------------------------------------------------------------------------------------------|----------------------|-----------------------|----------------------------------------------|--------------------------|---------|---------------------------|-----------------------|----------------------------------------------|--------------------------|---------|------------------------------|------------------------|--------------------------------------------|--------------------------|---------|
| Variable                                                                                  | Clinically pain free |                       |                                              |                          |         | Completed sports training |                       |                                              |                          |         | Return to full team training |                        |                                            |                          |         |
|                                                                                           | n                    | Variable distribution | CPF days                                     | Standardized effect size | p-value | n                         | Variable distribution | SST days                                     | Standardized effect size | p-value | n                            | Variable distribution  | RTT days                                   | Standardized effect size | p-value |
| Bruising<br>- No<br>- Yes                                                                 | 59                   | 58 (98%)<br>1 (2%)    | 15 [12-28], 6-79<br>7                        | -0.203                   | 0.102   | 49                        | 48 (98%)<br>1 (2%)    | 24 [16-33], 9-117<br>10                      | -0.218                   | 0.122   | 73                           | 70 (96%)<br>3 (4%)     | 22 [15-31], 5-99<br>11, 7-112              | -0.085                   | 0.498   |
| Swelling<br>- No<br>- Yes                                                                 | 59                   | 52 (88%)<br>7 (12%)   | 15.5 [11.5-28.5], 6-79<br>13 [11-16.5], 7-31 | -0.115                   | 0.387   | 49                        | 43 (88%)<br>6 (12%)   | 26 [16-33], 9-117<br>19 [16-24], 10-72       | -0.081                   | 0.582   | 73                           | 63 (86%)<br>10 (14%)   | 21 [14.5-31], 5-112<br>27 [16-70], 7-93    | 0.090                    | 0.441   |
| Adductor palpation pain<br>- negative<br>- positive                                       | 59                   | 0 (0%)<br>59 (100%)   | -<br>15 [11.5-27.5], 6-79                    | -                        | -       | 49                        | 0 (0%)<br>49 (100%)   | -<br>24 [16-32], 9-117                       | -                        | -       | 73                           | 0 (0%)<br>73 (100%)    | -<br>22 [15-31], 5-112                     | -                        | -       |
| 0° Squeeze<br>- negative<br>- positive                                                    | 59                   | 11 (19%)<br>48 (81%)  | 12 [9.5-14], 6-27<br>17.5 [12-29], 7-79      | 0.258                    | 0.048   | 49                        | 9 (18%)<br>40 (82%)   | 16 [13-20], 10-34<br>26.5 [16-41], 9-117     | 0.259                    | 0.070   | 73                           | 13 (18%)<br>60 (82%)   | 14 [11-21], 5-35<br>25.5 [16-35], 7-112    | 0.307                    | 0.009   |
| 45° Squeeze<br>- negative<br>- positive                                                   | 59                   | 16 (27%)<br>43 (73%)  | 14 [9.5-25.5], 6-44<br>15 [12-28.5], 7-79    | 0.139                    | 0.286   | 49                        | 14 (29%)<br>35 (71%)  | 22 [13-30], 10-64<br>24 [16-41], 9-117       | 0.100                    | 0.485   | 73                           | 18 (25%)<br>55 (75%)   | 21.5 [14-29], 7-57<br>22 [15-35], 5-112    | 0.065                    | 0.557   |
| Passive adductor stretch<br>- negative<br>- positive                                      | 59                   | 21 (36%)<br>38 (64%)  | 13 [12-23], 6-44<br>18 [11-30], 7-79         | 0.209                    | 0.109   | 49                        | 16 (33%)<br>33 (67%)  | 16 [14-28.5], 10-64<br>27 [17-45], 9-117     | 0.314                    | 0.028   | 73                           | 23 (32%)<br>50 (68%)   | 17 [13-26.5], 5-57<br>25.5 [16-37], 5-112  | 0.226                    | 0.054   |
| Outer-range resisted adduction<br>- negative<br>- positive                                | 59                   | 7 (12%)<br>52 (88%)   | 12 [7.5-13], 6-24<br>16.5 [12-29], 7-79      | 0.269                    | 0.039   | 49                        | 6 (12%)<br>43 (88%)   | 14.5 [10-17], 10-30<br>26 [16-35.5], 9-117   | 0.301                    | 0.035   | 73                           | 9 (12%)<br>64 (88%)    | 14 [13-17], 10-31<br>24.5 [15-34], 5-112   | 0.250                    | 0.033   |
| FABER test<br>- negative<br>- positive                                                    | 59                   | 35 (59%)<br>24 (41%)  | 13 [11-23], 6-33<br>24 [13-44], 7-79         | 0.382                    | 0.003   | 49                        | 28 (57%)<br>21 (43%)  | 17 [14-28.5], 9-37<br>32 [18-66], 13-117     | 0.417                    | 0.004   | 73                           | 41 (56%)<br>32 (44%)   | 18 [13-27], 5-41<br>31 [17-71.5], 7-112    | 0.376                    | 0.001   |
| Number of positive adductor tests (0-6)                                                   | 59                   | 5 [4-6], 1-6          | 15 [11.5-27.5], 6-79                         | 0.431                    | 0.001   | 49                        | 5 [4-6], 1-6          | 24 [16-32], 9-117                            | 0.484                    | <0.001  | 73                           | 5 [4-6], 1-6           | 22 [15-31], 5-112                          | 0.425                    | <0.001  |
| Palpation pain in abdominal muscle group<br>- No<br>- Yes                                 | 59                   | 52 (88%)<br>7 (12%)   | 13 [11-24], 6-75<br>55 [35-67], 23-79        | 0.477                    | <0.001  | 49                        | 42 (86%)<br>7 (14%)   | 19 [16-30], 9-78<br>66 [51-77.5], 26-117     | 0.522                    | 0.001   | 73                           | 65 (89%)<br>8 (11%)    | 20 [14-30], 5-112<br>67.5 [39-85], 7-99    | 0.310                    | 0.008   |
| Resistance/stretch pain in abdominal muscle group<br>- No<br>- Yes                        | 59                   | 52 (88%)<br>7 (12%)   | 13.5 [11-24.5], 6-79<br>40 [21-58], 13-73    | 0.333                    | 0.010   | 49                        | 43 (88%)<br>6 (12%)   | 21 [16-30], 9-117<br>61.5 [26-66], 16-89     | 0.293                    | 0.041   | 73                           | 64 (88%)<br>9 (12%)    | 20 [14-30.5], 5-112<br>67 [27-70], 16-97   | 0.309                    | 0.008   |
| Palpation pain in hip flexor muscle group<br>- No<br>- Yes                                | 59                   | 54 (92%)<br>5 (8%)    | 14.5 [11-29], 6-79<br>15 [13-24], 8-24       | -0.018                   | 0.892   | 49                        | 44 (90%)<br>5 (10%)   | 24 [16-35.5], 9-117<br>20 [16-29], 10-30     | -0.097                   | 0.497   | 73                           | 68 (93%)<br>5 (7%)     | 22 [14.5-32.5], 5-112<br>21 [16-30], 11-31 | -0.032                   | 0.785   |
| Resistance/stretch pain in hip flexor muscle group<br>- No<br>- Yes                       | 59                   | 38 (64%)<br>21 (36%)  | 12.5 [11-24], 6-79<br>23 [15-33], 7-75       | 0.363                    | 0.005   | 49                        | 32 (65%)<br>17 (35%)  | 17 [14.5-30], 10-117<br>30 [24-64], 9-78     | 0.364                    | 0.011   | 73                           | 48 (66%)<br>25 (44%)   | 18 [14-28], 5-112<br>31 [21-57], 7-96      | 0.254                    | 0.030   |
| Palpation pain at AL insertion<br>- no<br>- yes                                           | 59                   | 43 (73%)<br>16 (27%)  | 13 [11-21], 6-33<br>35 [18.5-58], 8-79       | 0.466                    | <0.001  | 49                        | 34 (69%)<br>15 (31%)  | 17.5 [15-27], 9-72<br>57 [31-67.5], 13-117   | 0.522                    | <0.001  | 73                           | 51 (70%)<br>22 (30%)   | 18 [13-27], 5-75<br>54 [26-80], 13-112     | 0.525                    | <0.001  |
| Distance of proximal AL palpation pain from pubic insertion, when not at insertion (cm)   | 41                   | 4 [2.5-5], 0.5-11.5   | 13 [11-21], 6-33                             | -0.144                   | 0.369   | 33                        | 3.5 [2.5-5], 0.5-9    | 17.5 [15-27], 9-72                           | -0.185                   | 0.303   | 50                           | 3.8 [2.5-5], 0.5-11.5  | 18 [13-27], 5-75                           | -0.120                   | 0.407   |
| Length of AL palpation pain (cm)                                                          | 57                   | 5.5 [3-8], 1-23       | 15 [12-28], 6-79                             | 0.016                    | 0.905   | 48                        | 6 [3-8], 1-23         | 24 [16-33], 9-117                            | -0.044                   | 0.767   | 71                           | 6 [3-8], 1-23          | 22 [15-31.5], 5-112                        | -0.074                   | 0.541   |
| Width of AL palpation pain (cm)                                                           | 57                   | 3.8 (2.1), 1-10       | 15 [12-28], 6-79                             | 0.291                    | 0.028   | 48                        | 3 [2.3-5.5], 1-9.5    | 24 [16-33], 9-117                            | 0.241                    | 0.098   | 71                           | 3 [2-5], 1-9.5         | 22 [15-31.5], 5-112                        | 0.213                    | 0.074   |
| Palpable defect<br>- no<br>- yes                                                          | 59                   | 52 (88%)<br>7 (12%)   | 13 [11-23.5], 6-61<br>44 [35.5-74], 30-79    | 0.515                    | <0.001  | 49                        | 42 (86%)<br>7 (14%)   | 19 [16-30], 9-66<br>72 [63-83.5], 45-117     | 0.577                    | <0.001  | 73                           | 63 (86%)<br>10 (14%)   | 19 [14-27], 5-68<br>86.5 [73-97], 51-112   | 0.586                    | <0.001  |
| Ability to perform eccentric adduction strength test<br>- No (pain/apprehension)<br>- Yes | 56                   | 19 (34%)<br>37 (66%)  | 24 [18-49.5], 11-79<br>12 [11-23], 6-44      | -0.498                   | <0.001  | 46                        | 18 (39%)<br>28 (63%)  | 30 [24-66], 16-117<br>16.5 [13.5-29.5], 9-72 | -0.495                   | 0.001   | 70                           | 25 (36%)<br>45 (64%)   | 32 [27-73], 9-112<br>17 [13-24], 5-75      | 0.568                    | <0.001  |
| Eccentric adduction strength LSI (%)                                                      | 37                   | 76 [64-86], 23-111    | 12 [11-23], 6-44                             | -0.490                   | 0.002   | 28                        | 74 [29-87], 23-111    | 16.5 [13.5-29.5], 9-72                       | -0.454                   | 0.015   | 45                           | 76 [64-88], 23-110     | 17 [13-24], 5-75                           | -0.286                   | 0.057   |
| ADD/ABD strength ratio on injured leg (%)                                                 | 37                   | 93 [72-101], 19-129   | 12 [11-23], 6-44                             | -0.471                   | 0.003   | 28                        | 94 [60-108], 19-129   | 16.5 [13.5-29.5], 9-72                       | -0.427                   | 0.023   | 45                           | 89 [70-99], 19-129     | 17 [13-24], 5-75                           | -0.229                   | 0.131   |
| Hip abduction ROM LSI (%)                                                                 | 59                   | 89 [65-101], 0-144    | 15 [11.5-27.5], 6-79                         | -0.461                   | <0.001  | 49                        | 87 [64-100], 0-133    | 24 [16-32], 9-117                            | -0.511                   | <0.001  | 72                           | 87.8 [58-100.1], 0-144 | 21.5 [14.5-31], 5-112                      | -0.373                   | 0.001   |
| Bent Knee Fall Out test LSI (%)                                                           | 58                   | 93 [72-107], 10-175   | 14.5 [11-27], 6-79                           | -0.482                   | <0.001  | 48                        | 90 [68-107], 10-140   | 22.5 [16-31], 9-117                          | -0.525                   | <0.001  | 71                           | 89 [63-106], 10-175    | 21 [14.5-31], 5-112                        | -0.439                   | <0.001  |

Distribution is reported as mean or median, with SD in round brackets and IQR in square brackets, followed by range, or n with percent of available sample. LSI = limb symmetry index. Color signify candidate variable considered for the multiple regression analysis ( $p \leq 0.2$ ), and bold font where  $p \leq 0.05$ .

## Appendix 1: Univariate analyses results for all examination types; history, clinical, and MRI.

| MRI                                                             |                      |                         |                        |                          |         |                           |                         |                      |                          |         |                              |                        |                       |                          |         |
|-----------------------------------------------------------------|----------------------|-------------------------|------------------------|--------------------------|---------|---------------------------|-------------------------|----------------------|--------------------------|---------|------------------------------|------------------------|-----------------------|--------------------------|---------|
| Variable                                                        | Clinically pain free |                         |                        |                          |         | Completed sports training |                         |                      |                          |         | Return to full team training |                        |                       |                          |         |
|                                                                 | n                    | Variable distribution   | CPF days               | Standardized effect size | p-value | n                         | Variable distribution   | SST days             | Standardized effect size | p-value | n                            | Variable distribution  | RTT days              | Standardized effect size | p-value |
| Number of adductor muscle injuries                              | 59                   |                         |                        | 0.570                    | <0.001  | 49                        |                         |                      | 0.652                    | <0.001  | 73                           |                        |                       | 0.639                    | <0.001  |
| - 0                                                             |                      | 12 (20%)                | 12.5 [11-14], 6-23     |                          |         |                           | 9 (18%)                 | 16 [15-17], 10-27    |                          |         |                              | 13 (18%)               | 17 [13-18], 5-27      |                          |         |
| - 1                                                             |                      | 35 (59%)                | 13 [11-23.5], 7-40     |                          |         |                           | 28 (57%)                | 19 [15-23.5], 9-57   |                          |         |                              | 44 (60%)               | 19.5 [13.5-27], 7-73  |                          |         |
| - 2                                                             |                      | 2 (3%)                  | 29, 44                 |                          |         |                           | 2 (4%)                  | 30, 64               |                          |         |                              | 3 (4%)                 | 31, 29-57             |                          |         |
| - 3                                                             |                      | 5 (8%)                  | 61 [31-75], 15-79      |                          |         |                           | 5 (10%)                 | 72 [66-78], 21-117   |                          |         |                              | 7 (10%)                | 75 [68-86.5], 33-99   |                          |         |
| - 4                                                             |                      | 5 (8%)                  | 44 [30-55], 29-73      |                          |         |                           | 5 (10%)                 | 66 [45-69], 32-89    |                          |         |                              | 6 (8%)                 | 82 [51-97], 37-112    |                          |         |
| - 5/6                                                           |                      | 0 (0%)                  | -                      |                          |         |                           | 0 (0%)                  | -                    |                          |         |                              | 0 (0%)                 | -                     |                          |         |
| Muscle(s) involved                                              | 59                   |                         |                        | -                        | <0.001  | 49                        |                         |                      | -                        | <0.001  | 73                           |                        |                       | -                        | <0.001  |
| - no adductor injury                                            |                      | 12 (20%)                | 12.5 [11-14], 6-23     |                          |         |                           | 9 (18%)                 | 16 [15-17], 10-27    |                          |         |                              | 13 (18%)               | 17 [13-18], 5-27      |                          |         |
| - isolated AL                                                   |                      | 28 (47%)                | 12.5 [9.5-23], 7-40    |                          |         |                           | 23 (47%)                | 17 [13.5-28], 9-57   |                          |         |                              | 37 (51%)               | 17 [13-26], 7-73      |                          |         |
| - AL & other adductor muscle                                    |                      | 12 (20%)                | 44 [29.5-67], 15-79    |                          |         |                           | 11 (22%)                | 66 [38.5-75], 21-117 |                          |         |                              | 16 (22%)               | 69 [44-94.5], 29-112  |                          |         |
| - other adductor muscle than AL                                 |                      | 7 (12%)                 | 18 [13-24.5], 10-28    |                          |         |                           | 5 (5%)                  | 28 [20-30] 16-30     |                          |         |                              | 7 (10%)                | 31 [21.5-31], 7-41    |                          |         |
| Primary adductor muscle injury                                  | 47                   |                         |                        | -                        | 0.982   | 40                        |                         |                      | -                        | 0.982   | 60                           |                        |                       | -                        | 0.956   |
| - Adductor longus                                               |                      | 40 (85%)                | 18.5 [12-30], 7-79     |                          |         |                           | 35 (88%)                | 27 [16-51], 9-117    |                          |         |                              | 53 (73%)               | 26 [15-37], 7-112     |                          |         |
| - Adductor brevis                                               |                      | 2 (4%)                  | 15, 25                 |                          |         |                           | 2 (5%)                  | 20, 30               |                          |         |                              | 2 (3%)                 | 21, 31                |                          |         |
| - Adductor magnus                                               |                      | 1 (2%)                  | 18                     |                          |         |                           | 1 (3%)                  | 28                   |                          |         |                              | 1 (1%)                 | 31                    |                          |         |
| - Pectineus                                                     |                      | 2 (4%)                  | 10, 28                 |                          |         |                           | 0 (0%)                  | -                    |                          |         |                              | 2 (3%)                 | 7, 41                 |                          |         |
| - Gracilis                                                      |                      | 0 (0%)                  | -                      |                          |         |                           | 0 (0%)                  | -                    |                          |         |                              | 0 (0%)                 | -                     |                          |         |
| - Obturator externus                                            |                      | 2 (4%)                  | 11, 24                 |                          |         |                           | 2 (5%)                  | 16, 30               |                          |         |                              | 2 (3%)                 | 22, 31                |                          |         |
| Highest injury grading                                          | 59                   |                         |                        | 0.557                    | <0.001  | 49                        |                         |                      | 0.671                    | <0.001  | 73                           |                        |                       | 0.557                    | <0.001  |
| - 0                                                             |                      | 12 (20%)                | 12.5 [11-14], 6-23     |                          |         |                           | 9 (18%)                 | 16 [15-17], 10-27    |                          |         |                              | 13 (18%)               | 17 [13-18], 5-27      |                          |         |
| - 1                                                             |                      | 16 (27%)                | 12.5 [11-16.5], 7-33   |                          |         |                           | 13 (27%)                | 17 [16-21], 9-37     |                          |         |                              | 18 (25%)               | 20.5 [16-26], 7-41    |                          |         |
| - 2                                                             |                      | 20 (34%)                | 17 [10.5-24], 7-44     |                          |         |                           | 16 (33%)                | 25 [15-30], 10-64    |                          |         |                              | 28 (38%)               | 20.5 [13.5-28], 7-57  |                          |         |
| - 3                                                             |                      | 11 (19%)                | 44 [30.5-67], 27-79    |                          |         |                           | 11 (22%)                | 66 [51-75], 32-117   |                          |         |                              | 14 (19%)               | 74 [67-96], 35-112    |                          |         |
| Injury location                                                 | 44                   |                         |                        | -0.732                   | <0.001  | 38                        |                         |                      | -0.768                   | <0.001  | 57                           |                        |                       | -0.747                   | <0.001  |
| - bone-tendon junction (BTJ)                                    |                      | 12 (27%)                | 44 [30.5-67], 25-79    |                          |         |                           | 12 (32%)                | 66 [51-75], 30-117   |                          |         |                              | 15 (26%)               | 73 [62-94.5], 31-112  |                          |         |
| - musculotendinous junction (MTJ)                               |                      | 32 (73%)                | 12.5 [10.5-18.5], 7-33 |                          |         |                           | 26 (68%)                | 17.5 [14-28] 9-37    |                          |         |                              | 42 (74%)               | 18.5 [13-27], 7-35    |                          |         |
| Additional injury in abdominal muscle group                     | 59                   |                         |                        | -                        | -       | 49                        |                         |                      | -                        | -       | 73                           |                        |                       | -                        | -       |
| - No                                                            |                      | 59 (100%)               | 15 [11.5-27.5], 6-79   |                          |         |                           | 49 (100%)               | 24 [16-32], 9-117    |                          |         |                              | 73 (100%)              | 22 [15-31], 5-112     |                          |         |
| - Yes                                                           |                      | 0 (0%)                  | -                      |                          |         |                           | 0 (0%)                  | -                    |                          |         |                              | 0 (0%)                 | -                     |                          |         |
| Additional injury in hip flexor muscle group                    | 59                   |                         |                        | 0.000                    | 1.000   | 49                        |                         |                      | -0.014                   | 0.919   | 73                           |                        |                       | 0.008                    | 0.946   |
| - No                                                            |                      | 57 (97%)                | 15 [12-27], 6-79       |                          |         |                           | 47 (96%)                | 24 [16-33], 9-117    |                          |         |                              | 71 (97%)               | 22 [14.5-31.5], 5-112 |                          |         |
| - Yes (sartorius)                                               |                      | 2 (3%)                  | 11, 29                 |                          |         |                           | 2 (4%)                  | 16, 30               |                          |         |                              | 2 (3%)                 | 17, 29                |                          |         |
| Additional injury in other muscle group                         | 59                   |                         |                        | -0.036                   | 0.785   | 49                        |                         |                      | -0.043                   | 0.761   | 73                           |                        |                       | -0.132                   | 0.260   |
| - No                                                            |                      | 57 (97%)                | 15 [11-28], 6-79       |                          |         |                           | 47 (96%)                | 24 [16-33], 9-117    |                          |         |                              | 70 (96%)               | 22 [15-32], 5-112     |                          |         |
| - Yes (vastus medialis)                                         |                      | 2 (3%)                  | 12, 18                 |                          |         |                           | 2 (4%)                  | 16, 28               |                          |         |                              | 3 (4%)                 | 13, 7-31              |                          |         |
| For adductor longus injuries only:                              |                      |                         |                        |                          |         |                           |                         |                      |                          |         |                              |                        |                       |                          |         |
| Proximal intramuscular edema distance from pubic insertion (mm) | 29                   | 56 [40-84], 0-124       | 13 [11-23], 7-44       | -0.182                   | 0.344   | 24                        | 57.5 [40.5-85], 0-124   | 17.5 [13.5-28], 9-64 | -0.323                   | 0.123   | 39                           | 52 [33-83], 0-145      | 18 [13.5-27], 7-57    | -0.325                   | 0.044   |
| Peripheral fluid thickness (mm)                                 | 29                   | 3 [2-6], 0-11           | 13 [11-23], 7-44       | 0.041                    | 0.833   | 24                        | 3.5 [1.5-6], 0-11       | 17.5 [13.5-28], 9-64 | -0.093                   | 0.667   | 39                           | 3 [2-6], 0-11          | 18 [13.5-27], 7-57    | -0.150                   | 0.364   |
| Proximal-distal intramuscular edema extent (mm)                 | 29                   | 66 [48-80], 23-166      | 13 [11-23], 7-44       | 0.256                    | 0.181   | 24                        | 67 [52.5-79.5], 23-166  | 17.5 [13.5-28], 9-64 | 0.330                    | 0.115   | 39                           | 72 [52.5-82], 23-166   | 18 [13.5-27], 7-57    | 0.043                    | 0.796   |
| Medial-lateral intramuscular edema extent (mm)                  | 29                   | 34 [25-37], 7-58        | 13 [11-23], 7-44       | 0.135                    | 0.486   | 24                        | 33.5 [22-37], 7-58      | 17.5 [13.5-28], 9-64 | 0.198                    | 0.354   | 39                           | 33 [20.5-36.5], 7-58   | 18 [13.5-27], 7-57    | 0.206                    | 0.206   |
| Anterior-posterior intramuscular edema extent (mm)              | 29                   | 23 [14-27], 8-48        | 13 [11-23], 7-44       | 0.048                    | 0.806   | 24                        | 23 [14.5-29.5], 8-48    | 17.5 [13.5-28], 9-64 | -0.066                   | 0.758   | 39                           | 23 [14.5-28.5], 6-48   | 18 [13.5-27], 7-57    | -0.090                   | 0.584   |
| Intramuscular edema CSA index (%)                               | 29                   | 34 [13-49], 2-77        | 13 [11-23], 7-44       | 0.275                    | 0.148   | 24                        | 34 [14-46.5], 2-77      | 17.5 [13.5-28], 9-64 | 0.246                    | 0.246   | 39                           | 34 [14-50], 2-95       | 18 [13.5-27], 7-57    | 0.126                    | 0.445   |
| MTJ injury location                                             | 28                   |                         |                        | -0.039                   | 0.835   | 23                        |                         |                      | -0.104                   | 0.618   | 38                           |                        |                       | -0.275                   | 0.090   |
| - proximal MTJ                                                  |                      | 14 (50%)                | 13 [11-19], 7-33       |                          |         |                           | 10 (43%)                | 19 [16-29], 10-37    |                          |         |                              | 19 (50%)               | 19 [15.5-27], 11-35   |                          |         |
| - distal MTJ                                                    |                      | 14 (50%)                | 12 [8-23], 7-29        |                          |         |                           | 13 (57%)                | 17 [13-27], 9-30     |                          |         |                              | 19 (50%)               | 15 [11.5-23.5], 7-32  |                          |         |
| Intramuscular collection/disruption CSA index (%)               | 18                   | 5 [3-9], 1-25           | 17 [11-24], 7-44       | -0.358                   | 0.145   | 15                        | 5 [3-9], 1-25           | 24 [15-29.5], 10-64  | -0.457                   | 0.086   | 25                           | 5 [3-11], 1-25         | 19 [14-27], 7-57      | -0.222                   | 0.287   |
| Intramuscular collection/disruption volume (cm³)                | 18                   | 1.5 [0.6-4.3], 0.3-23.7 | 17 [11-24], 7-44       | -0.369                   | 0.132   | 15                        | 1.5 [0.6-2.4], 0.1-23.7 | 24 [15-29.5], 10-64  | 0.472                    | 0.076   | 25                           | 1.5 [0.6-4], 0.02-23.7 | 19 [14-27], 7-57      | -0.247                   | 0.234   |
| Intramuscular tendon disruption (grade 2 only)                  | 18                   |                         |                        | 0.112                    | 0.635   | 15                        |                         |                      | 0.421                    | 0.103   | 25                           |                        |                       | 0.168                    | 0.401   |
| - no                                                            |                      | 15 (83%)                | 16 [11.5-23.5], 7-29   |                          |         |                           | 14 (93%)                | 24 [14-29], 10-30    |                          |         |                              | 22 (88%)               | 17.5 [13-27], 7-32    |                          |         |
| - yes                                                           |                      | 3 (17%)                 | 19, 8-44               |                          |         |                           | 1 (7%)                  | 64                   |                          |         |                              | 3 (12%)                | 22, 15-57             |                          |         |

Distribution is reported as mean or median, with SD in round brackets and IQR in square brackets, followed by range, or n with percent of available sample. CSA = cross sectional area. Color signify candidate variable considered for the multiple regression analysis ( $p \leq 0.2$ ), and bold font where  $p \leq 0.05$ .
