# Supplementary material
Source: publisher figshare collection journal article supplement (https://sage.figshare.com/ndownloader/files/22046715)
Supplement: Supplementary file 4 [file 22046715]

**Appendix 4:** Post hoc multiple regression results for each examination type separately; patient history, clinical, and MRI.

Table 1: Post hoc multiple regression results for patient history only. (n=39, n=31, n=46, respectively).

| Clinically pain free           |                      |                         | Completed sports training      |                      |                         | Return to full team training             |                      |                         |
|--------------------------------|----------------------|-------------------------|--------------------------------|----------------------|-------------------------|------------------------------------------|----------------------|-------------------------|
| Variable                       | Predictor importance | Adjusted r <sup>2</sup> | Variable                       | Predictor importance | Adjusted r <sup>2</sup> | Variable                                 | Predictor importance | Adjusted r <sup>2</sup> |
| Age (y)                        | 0.34                 | 0.144                   | HAGOS – Symptoms (0-100)       | 0.55                 | 0.103                   | Discontinuation of sport within 5m (y/n) | 0.75                 | 0.174                   |
| HAGOS – Pain (0-100)           | 0.28                 |                         | Max pain at injury time (0-10) | 0.45                 |                         | HAGOS – Pain (0-100)                     | 0.25                 |                         |
| Max pain at injury time (0-10) | 0.19                 |                         |                                |                      |                         |                                          |                      |                         |
| HAGOS – ADL (0-100)            | 0.19                 |                         |                                |                      |                         |                                          |                      |                         |

Table 2: Post hoc multiple regression results for clinical examination tests only. (n=39, n=32, n=49, respectively).

| Clinically pain free                      |                      |                         | Completed sports training                 |                      |                         | Return to full team training                              |                      |                         |
|-------------------------------------------|----------------------|-------------------------|-------------------------------------------|----------------------|-------------------------|-----------------------------------------------------------|----------------------|-------------------------|
| Variable                                  | Predictor importance | Adjusted r <sup>2</sup> | Variable                                  | Predictor importance | Adjusted r <sup>2</sup> | Variable                                                  | Predictor importance | Adjusted r <sup>2</sup> |
| Eccentric adduction strength symmetry (%) | 0.63                 | 0.235                   | Eccentric adduction strength symmetry (%) | 1.00                 | 0.248                   | Ability to perform eccentric adductor strength test (y/n) | 0.68                 | 0.178                   |
| Width of AL palpation pain (cm)           | 0.22                 |                         |                                           |                      |                         | Squeeze 0° pain (y/n)                                     | 0.32                 |                         |
| Squeeze 0° pain (y/n)                     | 0.16                 |                         |                                           |                      |                         |                                                           |                      |                         |

Table 3: Post hoc multiple regression results for MRI findings only. (n=34, n=27, n=41, respectively).

| Clinically pain free                    |                      |                         | Completed sports training                            |                      |                         | Return to full team training                        |                      |                         |
|-----------------------------------------|----------------------|-------------------------|------------------------------------------------------|----------------------|-------------------------|-----------------------------------------------------|----------------------|-------------------------|
| Variable                                | Predictor importance | Adjusted r <sup>2</sup> | Variable                                             | Predictor importance | Adjusted r <sup>2</sup> | Variable                                            | Predictor importance | Adjusted r <sup>2</sup> |
| MRI intramuscular oedema CSA index (mm) | 1.00                 | 0.007                   | MRI proximal-distal intramuscular oedema extent (mm) | 1.00                 | 0.046                   | Muscle(s) involved on MRI                           | 0.73                 | 0.171                   |
|                                         |                      |                         |                                                      |                      |                         | MRI medial-lateral intramuscular oedema extent (mm) | 0.27                 |                         |
